# Supplementary material for: Intranasal Microemulsion as an Innovative and Promising Alternative to the Oral Route in Improving Stiripentol Brain Targeting
Source: MDPI journal article supplement (doi:10.3390/pharmaceutics15061641), 2023-06-01
Supplement: s1 [file s1]

**Table S2.** Comparison between pharmacokinetic parameters obtained in plasma after the administration of alternative formulations developed for oral administration of stiripentol (STP), with the pharmacokinetic parameters obtained in plasma after administration of the developed intranasal (IN) microemulsions FS6, FS6 plus 0.25% chitosan (FS6+0.25%CH) and F30 plus 0.25% chitosan and 1% albumin (FS6+0.25%CH+1%BSA) in a dose of 12.5 mg/kg.

| Formulation                      | Administered dose | Plasma C <sub>max</sub> (ng/mL) | Plasma AUC <sub>0-t</sub> (ng.h/mL) | F <sub>rel</sub> (%) <sup>a</sup> | Ref.          |
|----------------------------------|-------------------|---------------------------------|-------------------------------------|-----------------------------------|---------------|
| Oral self-nanoemulsifying system | 40 mg/kg          | 4048.38 ± 704.54                | 7754.58 ± 1489.37                   | 218.01%                           | [15]          |
| Oral nanoemulsion                | 27 mg/kg          | 6160                            | 21060                               | 206.2%                            | [12]          |
| Oral polymeric micelles          | 50 mg/kg          | 5310 ± 1010                     | 19770 ± 3440                        | 444%                              | [18]          |
| IN FS6                           | 12.5 mg/kg        | 23955.75                        | 14541.02                            | 946.6%                            | Present study |
| IN FS6+0.25%CH                   | 12.5 mg/kg        | 16904.76                        | 13485.48                            | 892.6%                            | Present study |
| IN FS6+0.25%CH+0.1%BSA           | 12.5 mg/kg        | 19218.36                        | 16193.14                            | 1053.5%                           | Present study |

AUC<sub>0-t</sub>, area under the concentration time-curve from time zero to the time of the last quantifiable drug concentration; C<sub>max</sub>, maximum peak concentration; F<sub>rel</sub>, relative bioavailability; IN, intranasal.

<sup>a</sup> Only Lu et. al. compared the results of its study with a dilution of the commercial Diacomit® oral suspension. The remaining studies compared it with an oral suspension of STP prepared in a 0.5% solution of carboxymethyl-cellulose.
