# Supplementary material for: Intranasal Microemulsion as an Innovative and Promising Alternative to the Oral Route in Improving Stiripentol Brain Targeting
Source: MDPI journal article supplement (doi:10.3390/pharmaceutics15061641), 2023-06-01
Supplement: s1 [file s1]

**Table S1.** Significance matrix presenting the significant differences ( $p < 0.05$ ) in mice plasma and brain between the three intranasal formulations studied and between intranasal formulations, intravenous and oral (normalized concentrations) administration routes at the different post-administration times. Statistical analysis performed by a two-way ANOVA with Tukey's multiple comparisons post-hoc test.

| Mice matrix. | Time (min) | Significance matrix |             |                   |                      |
|--------------|------------|---------------------|-------------|-------------------|----------------------|
|              |            | IN formulations     | FS6+0.25%CH | FS6+0.25%CH+1%BSA | IV Oral (normalized) |
| Plasma       | 5          | FS6                 | ns          | ns                | <0.0001 0.0024       |
|              |            | FS6+0.25%CH         | --          | ns                | 0.0029 ns            |
|              |            | FS6+0.25%CH+1%BSA   | --          | --                | <0.0001 0.0023       |
|              | 10         | FS6                 | ns          | ns                | 0.0221 0.0048        |
|              |            | FS6+0.25%CH         | --          | ns                | ns ns                |
|              |            | FS6+0.25%CH+1%BSA   | --          | --                | ns ns                |
|              | 15         | FS6                 | 0.0292      | ns                | 0.0008 0.0015        |
|              |            | FS6+0.25%CH         | --          | ns                | ns Ns                |
|              |            | FS6+0.25%CH+1%BSA   | --          | --                | 0.0255 0.0134        |
|              | 30         | FS6                 | ns          | ns                | 0.0469 0.0343        |
|              |            | FS6+0.25%CH         | --          | ns                | ns 0.0395            |
|              |            | FS6+0.25%CH+1%BSA   | --          | --                | 0.0283 0.0230        |
|              | 45         | FS6                 | ns          | ns                | ns ns                |
|              |            | FS6+0.25%CH         | --          | --                | ns ns                |
|              |            | FS6+0.25%CH+1%BSA   | --          | --                | ns ns                |
|              | 60         | FS6                 | ns          | ns                | ns ns                |
|              |            | FS6+0.25%CH         | --          | ns                | 0.0332 0.0292        |
|              |            | FS6+0.25%CH+1%BSA   | --          | --                | ns ns                |
|              | 90         | FS6                 | ns          | ns                | ns ns                |
|              |            | FS6+0.25%CH         | --          | ns                | 0.0018 0.0099        |
|              |            | FS6+0.25%CH+1%BSA   | --          | --                | 0.0401 0.0373        |
|              | 120        | FS6                 | ns          | ns                | 0.0141 0.0183        |
|              |            | FS6+0.25%CH         | --          | ns                | ns ns                |
|              |            | FS6+0.25%CH+1%BSA   | --          | --                | 0.0353 0.0438        |
|              | 180        | FS6                 | ns          | ns                | ns ns                |
|              |            | FS6+0.25%CH         | --          | 0.0017            | 0.0011 0.0005        |
|              |            | FS6+0.25%CH+1%BSA   | --          | --                | 0.0429 ns            |
|              | 240        | FS6                 | ns          | ns                | ns ns                |
|              |            | FS6+0.25%CH         | --          | ns                | 0.0278 ns            |
|              |            | FS6+0.25%CH+1%BSA   | --          | --                | ns ns                |
|              | 360        | FS6                 | ns          | 0.0029            | ns ns                |
|              |            | FS6+0.25%CH         | --          | ns                | 0.0235 0.0192        |
|              |            | FS6+0.25%CH+1%BSA   | ns          | ns                | 0.0029 0.0011        |
|              | 480        | FS6                 | ns          | ns                | 0.0199 ns            |
|              |            | FS6+0.25%CH         | --          | ns                | ns ns                |
|              |            | FS6+0.25%CH+1%BSA   | --          | --                | ns ns                |
|              | 600        | FS6                 | ns          | ns                | 0.0304 ns            |
|              |            | FS6+0.25%CH         | --          | ns                | ns ns                |
|              |            | FS6+0.25%CH+1%BSA   | --          | --                | ns ns                |
|              | 720        | FS6                 | ns          | ns                | 0.0305 0.0411        |
|              |            | FS6+0.25%CH         | --          | ns                | ns ns                |
|              |            | FS6+0.25%CH+1%BSA   | --          | --                | ns ns                |
| Brain        | 5          | FS6                 | ns          | ns                | 0.0105 ns            |
|              |            | FS6+0.25%CH         | --          | ns                | 0.0080 0.0251        |
|              |            | FS6+0.25%CH+1%BSA   | --          | --                | 0.0074 0.0433        |
|              | 10         | FS6                 | 0.0223      | ns                | 0.0074 0.0033        |
|              |            | FS6+0.25%CH         | --          | ns                | ns 0.0062            |

|     |                   |        |        |        |         |
|-----|-------------------|--------|--------|--------|---------|
|     | FS6+0.25%CH+1%BSA | --     | --     | ns     | ns      |
|     | FS6               | 0.0292 | ns     | 0.0276 | 0.0140  |
| 15  | FS6+0.25%CH       | --     | 0.0195 | ns     | 0.0095  |
|     | FS6+0.25%CH+1%BSA | --     | --     | 0.0394 | 0.0065  |
|     | FS6               | ns     | ns     | ns     | 0.0115  |
| 30  | FS6+0.25%CH       | --     | ns     | ns     | 0.0318  |
|     | FS6+0.25%CH+1%BSA | --     | --     | ns     | 0.0072  |
|     | FS6               | ns     | ns     | ns     | ns      |
| 45  | FS6+0.25%CH       | --     | ns     | ns     | ns      |
|     | FS6+0.25%CH+1%BSA | --     | --     | ns     | 0.0075  |
|     | FS6               | ns     | ns     | 0.0389 | 0.0087  |
| 60  | FS6+0.25%CH       | --     | ns     | 0.0476 | 0.0142  |
|     | FS6+0.25%CH+1%BSA | --     | -      | ns     | ns      |
|     | FS6               | ns     | ns     | ns     | ns      |
| 90  | FS6+0.25%CH       | --     | ns     | 0.0299 | 0.0014  |
|     | FS6+0.25%CH+1%BSA | --     | --     | 0.0243 | 0.0087  |
|     | FS6               | ns     | ns     | ns     | ns      |
| 120 | FS6+0.25%CH       | --     | ns     | 0.0304 | 0.0065  |
|     | FS6+0.25%CH+1%BSA | --     | --     | ns     | ns      |
|     | FS6               | --     | --     | --     | 0.0102  |
| 180 | FS6+0.25%CH       | --     | --     | --     | 0.0102  |
|     | FS6+0.25%CH+1%BSA | --     | --     | --     | 0.0102  |
|     | FS6               | --     | ns     | --     | <0.0001 |
| 240 | FS6+0.25%CH       | --     | ns     | --     | <0.0001 |
|     | FS6+0.25%CH+1%BSA | --     | --     | ns     | ns      |
|     | FS6               | --     | 0.0062 | --     | --      |
| 360 | FS6+0.25%CH       | --     | 0.0062 | --     | --      |
|     | FS6+0.25%CH+1%BSA | --     | --     | 0.0062 | 0.0062  |
|     | FS6               | --     | 0.0147 | --     | --      |
| 480 | FS6+0.25%CH       | --     | 0.0147 | --     | --      |
|     | FS6+0.25%CH+1%BSA | --     | --     | 0.0147 | 0.0147  |
|     | FS6               | --     | --     | --     | --      |
| 600 | FS6+0.25%CH       | --     | --     | --     | --      |
|     | FS6+0.25%CH+1%BSA | --     | --     | --     | --      |
|     | FS6               | --     | --     | --     | --      |
| 720 | FS6+0.25%CH       | --     | --     | --     | --      |
|     | FS6+0.25%CH+1%BSA | --     | --     | --     | --      |
